# Supplementary material for: Rapid Estimation of Soil Pb Concentration Based on Spectral Feature Screening and Multi-Strategy Spectral Fusion
Source: MDPI journal article supplement (doi:10.3390/s23187707), 2023-09-06
Supplement: s1 [file s1]

---

**Supplementary Materials:****Table S1.** Descriptive statistics of characterizations information of soil samples. Unit: g/kg

| Character<br>izations | Mini<br>mum | Maxi<br>mum | Me<br>an   | Standard<br>deviation | Me<br>dian | CV          |
|-----------------------|-------------|-------------|------------|-----------------------|------------|-------------|
| N1                    | 7.68        | 3367        | 58.<br>27  | 226.72                | 39.5<br>4  | 389.<br>06% |
| N2                    | 4.5         | 551         | 88.<br>46  | 65.98                 | 72.7<br>6  | 74.5<br>9%  |
| K                     | 58.9        | 1206        | 390<br>.37 | 204.55                | 363.<br>5  | 52.4<br>0%  |
| P                     | 4.37        | 665.4       | 89.<br>01  | 94.2                  | 58.8<br>2  | 105.<br>83% |
| Organic<br>carbon     | 5.51        | 18.72       | 13.<br>91  | 86.94                 | 6.47       | 95.2<br>4%  |

**Table S2.** Information on particle size composition of soil samples

|            | clay(<2μm) | silt(2-50μm) | sand(50-2000μm) |
|------------|------------|--------------|-----------------|
| Percentage | 16.93%     | 77.38%       | 5.69%           |
